# Supplementary material for: Analysis of Single Nucleotide Variants in CRISPR-Cas9 Edited Zebrafish Exomes Shows No Evidence of Off-Target Inflation
Source: PubMed Central journal article supplement (PMC6797590; doi:10.3389/fgene.2019.00949), 2019-10-11
Supplement: DataSheet_2.pdf [file DataSheet_2.pdf]

## *Supplementary Material*

**Suppl. Table S1: sgRNA gene targets, efficiencies, and quality score, and potential for off-targeting**

| Gene          | sgRNA number | Efficiency (%) | Targeted genomic sequence              | Genomic location            | MIT quality score | # exonic predicted off-target loci by >1 caller* |
|---------------|--------------|----------------|----------------------------------------|-----------------------------|-------------------|--------------------------------------------------|
| <b>anln</b>   | g1           | Low (32)       | GAAGATGGCG<br>GAGAGACCAA<br><b>CGG</b> | chr19:36997110-<br>36997132 | 89                | 5/151                                            |
|               | g6           | High (100)     | GAAGGCTTAT<br>TATCATGCAG<br><b>TGG</b> | chr19:36992519-<br>36992541 | 84                | 1/233                                            |
| <b>kmt2d</b>  | g3           | Low (30)       | GGTGGATTCA<br>GAGAATCCAA<br><b>TGG</b> | chr23:28003803-<br>28003825 | 79                | 1/99                                             |
|               | g4           | High (100)     | GGGTGAGGTG<br>CTGATAAACG<br><b>TGG</b> | chr23:28007878-<br>28007900 | 91                | 4/74                                             |
| <b>smchd1</b> | g4           | Low (31)       | CAACGCTTTCT<br>GTCCTTCGCT<br><b>GG</b> | chr7:75276576-<br>75276598  | 97                | 4/60                                             |
|               | g5           | High (100)     | GAGATGTCGA<br>AAGTCCGCGG<br><b>TGG</b> | chr7:75274461-<br>75274483  | 99                | 0/99                                             |

\*Total represents the union of the three off-target prediction algorithms: CRISPOR, CasOFFinder, and CRISPR-direct.

**Suppl. Table S2: Variant counts during filtering in F1 individuals**

| Sample             | MuTect2              |                              |                                 | VarScan2            |                              |                                 |
|--------------------|----------------------|------------------------------|---------------------------------|---------------------|------------------------------|---------------------------------|
|                    | originally reported* | exclude grand-parent & dbSNP | passing filters + AF $\geq 0.3$ | originally reported | exclude grand-parent & dbSNP | passing filters + AF $\geq 0.3$ |
| smchd1-S1          | 107784               | 16467                        | 93                              | 721082              | 4836                         | 23                              |
| smchd1-S2          | 91320.5              | 14343                        | 65                              | 720522              | 5444                         | 14                              |
| smchd1-S3          | 93910                | 14820                        | 75                              | 722006              | 5175                         | 23                              |
| smchd1-S4          | 98067                | 16162                        | 77                              | 721454              | 4983                         | 19                              |
| smchd1-Cas9-S5     | 99133.5              | 15695                        | 70                              | 722267              | 5152                         | 28                              |
| smchd1-Cas9-S6     | 98879                | 18379                        | 47                              | 722224              | 5048                         | 13                              |
| smchd1-Cas9-S7     | 90394.5              | 16366                        | 79                              | 722826              | 5074                         | 15                              |
| smchd1-Cas9-S8     | 102871.5             | 15899                        | 48                              | 722018              | 4847                         | 8                               |
| smchd1-g5-S9       | 111667.5             | 22892                        | 82                              | 721814              | 5790                         | 25                              |
| smchd1-g5-S10      | 93602.5              | 13941                        | 51                              | 718963              | 5279                         | 19                              |
| smchd1-g5-S11      | 102256.5             | 12190                        | 86                              | 718274              | 4909                         | 23                              |
| smchd1-g5-S12      | 100041               | 14611                        | 73                              | 718720              | 5157                         | 25                              |
| smchd1-g5-Cas9-S13 | 96334.5              | 18489                        | 52                              | 721700              | 5327                         | 21                              |
| smchd1-g5-Cas9-S14 | 91999                | 18250                        | 63                              | 720369              | 5059                         | 27                              |
| smchd1-g5-Cas9-S15 | 98719                | 18893                        | 46                              | 720855              | 5252                         | 13                              |
| smchd1-g5-Cas9-S16 | 97144.5              | 17803                        | 70                              | 720601              | 5114                         | 34                              |

\*Reported count is an average of the counts called against the female grandparent and the counts called against the male grandparent.

Samples S1-S12 are control individuals, samples S13-S16 are CRISPR-Cas9 edited individuals.

**Suppl. Table S3: Average count of candidate *de novo* mutations by generation and calling method**

| sgRNA          | Efficiency | Cas9    | Condition | MuTect2   |           | VarScan2 |           |
|----------------|------------|---------|-----------|-----------|-----------|----------|-----------|
|                |            |         |           | F0        | F1        | F0       | F1        |
| <b>none</b>    |            | absent  | control   | 41        | 76        | 6        | 19        |
|                |            | present | control   | 24        | 60        | 6        | 16        |
| <i>smchd1</i>  | high       | absent  | control   | 21        | 72        | 4        | 23        |
|                |            | present | edited    | 26        | 55        | 4        | 23        |
|                | low        | absent  | control   | 27        |           | 3        |           |
|                |            | present | edited    | 22        |           | 5        |           |
| <i>anln</i>    | high       | absent  | control   | 19        |           | 3        |           |
|                |            | present | edited    | 29        |           | 5        |           |
|                | low        | absent  | control   | 13        |           | 2        |           |
|                |            | present | edited    | 33        |           | 7        |           |
| <i>kmt2d</i>   | high       | absent  | control   | 23        |           | 3        |           |
|                |            | present | edited    | 27        |           | 3        |           |
|                | low        | absent  | control   | 22        |           | 4        |           |
|                |            | present | edited    | 39        |           | 7        |           |
| <b>Average</b> |            |         |           | <b>26</b> | <b>66</b> | <b>4</b> | <b>20</b> |

**Suppl. Table S4: Wilcox comparison p-values in F1**

| <b>Sample</b>            | <b>MuTect2</b> | <b>Varscan2</b> |
|--------------------------|----------------|-----------------|
| <b>Control vs edited</b> | <b>0.11</b>    | <b>0.47</b>     |
| <b>Cas9 present vs</b>   |                |                 |
| <b>absent</b>            | <b>0.03</b>    | <b>0.71</b>     |
| <b>Guide present vs</b>  |                |                 |
| <b>absent</b>            | <b>0.64</b>    | <b>0.15</b>     |

**Suppl. Table S5: Wilcox comparison p-values on variants called by both callers in F1**

| <b>Sample</b>                      | <b>AF <math>\geq</math> 0.3</b> |
|------------------------------------|---------------------------------|
| <b>Control vs edited</b>           | <b>0.78</b>                     |
| <b>Cas9 present vs<br/>absent</b>  | <b>0.57</b>                     |
| <b>Guide present vs<br/>absent</b> |                                 |
| <b>High vs none</b>                | <b>1.0</b>                      |

**Suppl. Table S6: Variant counts in F1 individuals with and without dbSNP filter**

| Sample             | Original filtering strategy |                              |                                 | Alternative filtering strategy |                                      |                |             |
|--------------------|-----------------------------|------------------------------|---------------------------------|--------------------------------|--------------------------------------|----------------|-------------|
|                    | Original count              | exclude grand-parent & dbSNP | passing filters + AF $\geq$ 0.3 | Original count                 | exclude grand-parent & AF $\geq$ 0.3 | non-repetitive | cross-noise |
| smchd1-S1          | 721082                      | 4836                         | 23                              | 721082                         | 295                                  | 257            | 52          |
| smchd1-S2          | 720522                      | 5444                         | 14                              | 720522                         | 291                                  | 256            | 40          |
| smchd1-S3          | 722006                      | 5175                         | 23                              | 722006                         | 311                                  | 293            | 73          |
| smchd1-S4          | 721454                      | 4983                         | 19                              | 721454                         | 368                                  | 318            | 60          |
| smchd1-Cas9-S5     | 722267                      | 5152                         | 28                              | 722267                         | 325                                  | 263            | 84          |
| smchd1-Cas9-S6     | 722224                      | 5048                         | 13                              | 722224                         | 287                                  | 243            | 49          |
| smchd1-Cas9-S7     | 722826                      | 5074                         | 15                              | 722826                         | 274                                  | 237            | 50          |
| smchd1-Cas9-S8     | 722018                      | 4847                         | 8                               | 722018                         | 293                                  | 249            | 44          |
| smchd1-g5-S9       | 721814                      | 5790                         | 25                              | 721814                         | 370                                  | 304            | 92          |
| smchd1-g5-S10      | 718963                      | 5279                         | 19                              | 718963                         | 289                                  | 241            | 51          |
| smchd1-g5-S11      | 718274                      | 4909                         | 23                              | 718274                         | 273                                  | 222            | 75          |
| smchd1-g5-S12      | 718720                      | 5157                         | 25                              | 718720                         | 342                                  | 258            | 83          |
| smchd1-g5-Cas9-S13 | 721700                      | 5327                         | 21                              | 721700                         | 303                                  | 268            | 75          |
| smchd1-g5-Cas9-S14 | 720369                      | 5059                         | 27                              | 720369                         | 363                                  | 274            | 84          |
| smchd1-g5-Cas9-S15 | 720855                      | 5252                         | 13                              | 720855                         | 278                                  | 233            | 56          |
| smchd1-g5-Cas9-S16 | 720601                      | 5114                         | 34                              | 720601                         | 419                                  | 327            | 98          |

Samples S1-S12 are control individuals, samples S13-S16 are CRISPR-Cas9 edited individuals.

**Suppl. Table S7: Variants observed in multiple F1 individuals**

| <b>Sample</b>              | <b>Prior to cross-noise filtering</b> | <b>Remove between-condition cross-noise</b> | <b>Mis-called in deletion</b> | <b>Mis-realignment</b> | <b>Evidence in grandparent</b> | <b>Variants passing review</b> |
|----------------------------|---------------------------------------|---------------------------------------------|-------------------------------|------------------------|--------------------------------|--------------------------------|
| <b>CONTROL unique loci</b> |                                       | <b>385</b>                                  |                               |                        |                                |                                |
| smchd1-S1                  | 257                                   | 87                                          |                               |                        |                                |                                |
| smchd1-S2                  | 256                                   | 99                                          |                               |                        |                                |                                |
| smchd1-S3                  | 293                                   | 96                                          |                               |                        |                                |                                |
| smchd1-S4                  | 318                                   | 94                                          |                               |                        |                                |                                |
| smchd1-Cas9-S5             | 263                                   | 91                                          |                               |                        |                                |                                |
| smchd1-Cas9-S6             | 243                                   | 95                                          |                               |                        |                                |                                |
| smchd1-Cas9-S7             | 237                                   | 90                                          |                               |                        |                                |                                |
| smchd1-Cas9-S8             | 249                                   | 103                                         |                               |                        |                                |                                |
| smchd1-g5-S9               | 304                                   | 89                                          |                               |                        |                                |                                |
| smchd1-g5-S10              | 241                                   | 90                                          |                               |                        |                                |                                |
| smchd1-g5-S11              | 222                                   | 55                                          |                               |                        |                                |                                |
| smchd1-g5-S12              | 258                                   | 77                                          |                               |                        |                                |                                |
| <b>EDITED unique loci</b>  |                                       | <b>39</b>                                   | <b>35</b>                     | <b>3</b>               | <b>1</b>                       | <b>0</b>                       |
| smchd1-g5-Cas9-S13         | 268                                   | 21                                          | 20                            | 1                      | 0                              | 0                              |
| smchd1-g5-Cas9-S14         | 274                                   | 20                                          | 17                            | 2                      | 1                              | 0                              |
| smchd1-g5-Cas9-S15         | 233                                   | 21                                          | 18                            | 3                      | 0                              | 0                              |
| smchd1-g5-Cas9-S16         | 327                                   | 23                                          | 19                            | 3                      | 1                              | 0                              |
| <b>TOTAL unique loci</b>   | <b>879</b>                            | <b>424</b>                                  |                               |                        |                                |                                |

Control samples S1-S12 and edited samples S13-S16. Variants observed more than once, but in individuals exposed to different guide and Cas9 conditions, are enumerated in as between-guide cross-noise. Variants observed more than once among individuals exposed to the same guide and Cas9 conditions are reviewed in IGV and if there is no evidence of calling error or reads in the grandparents, they are enumerated in the table as variants passing review.

**Suppl. Table S8: Variant counts during filtering in F0 individuals**

| Sample          | MuTect2              |                        |                            | ≥30x VarScan2       |                        |                            |
|-----------------|----------------------|------------------------|----------------------------|---------------------|------------------------|----------------------------|
|                 | originally reported* | exclude parent & dbSNP | passing filters + AF ≥ 0.3 | originally reported | exclude parent & dbSNP | passing filters + AF ≥ 0.3 |
| uninjected-3    | 98730                | 18231                  | 19                         | 714178              | 4281                   | 3                          |
| uninjected-5    | 153632.5             | 38063                  | 63                         | 724678              | 6727                   | 9                          |
| Cas9-4          | 133284               | 25688                  | 25                         | 719479              | 4405                   | 8                          |
| Cas9-5          | 133735               | 25761                  | 24                         | 713112              | 4663                   | 5                          |
| anln-g1-1       | 117437.5             | 16151                  | 12                         | 706727              | 4899                   | 1                          |
| anln-g1-3       | 140097               | 28430                  | 15                         | 720890              | 5970                   | 4                          |
| anln-g1-Cas9-10 | 125951.5             | 19246                  | 26                         | 706488              | 4593                   | 1                          |
| anln-g1-Cas9-4  | 109913               | 21248                  | 23                         | 712796              | 4419                   | 4                          |
| anln-g1-Cas9-5  | 125363.5             | 27518                  | 23                         | 717865              | 5235                   | 7                          |
| anln-g1-Cas9-6  | 152948.5             | 43391                  | 84                         | 726997              | 7228                   | 16                         |
| anln-g1-Cas9-7  | 123259.5             | 19800                  | 25                         | 711674              | 4780                   | 10                         |
| anln-g1-Cas9-9  | 113957.5             | 16139                  | 19                         | 704081              | 4497                   | 6                          |
| anln-g6-3       | 122569.5             | 26063                  | 17                         | 712519              | 4386                   | 1                          |
| anln-g6-4       | 131988.5             | 22096                  | 21                         | 710221              | 4236                   | 6                          |
| anln-g6-Cas9-10 | 139893.5             | 30275                  | 21                         | 718040              | 5273                   | 6                          |
| anln-g6-Cas9-3  | 116501               | 26021                  | 36                         | 713070              | 4956                   | 6                          |
| anln-g6-Cas9-4  | 123799.5             | 26379                  | 48                         | 717711              | 5671                   | 4                          |
| anln-g6-Cas9-5  | 132917.5             | 25629                  | 28                         | 715359              | 5025                   | 4                          |
| anln-g6-Cas9-6  | 137644               | 29799                  | 19                         | 715692              | 4722                   | 4                          |
| anln-g6-Cas9-8  | 120272.5             | 24997                  | 25                         | 719710              | 4659                   | 6                          |
| kmt2d-g3-4      | 116601.5             | 20554                  | 22                         | 722869              | 5663                   | 5                          |
| kmt2d-g3-5      | 139178               | 28685                  | 23                         | 714383              | 5739                   | 3                          |
| kmt2d-g3-Cas9-1 | 118623               | 24801                  | 60                         | 720884              | 4646                   | 10                         |
| kmt2d-g3-Cas9-2 | 116798               | 20458                  | 46                         | 715781              | 5446                   | 7                          |
| kmt2d-g3-Cas9-4 | 133515.5             | 34500                  | 45                         | 722333              | 5807                   | 10                         |
| kmt2d-g3-Cas9-5 | 111948.5             | 25153                  | 32                         | 715519              | 4491                   | 5                          |
| kmt2d-g3-Cas9-6 | 119867.5             | 24248                  | 28                         | 719554              | 5316                   | 4                          |
| kmt2d-g3-Cas9-9 | 133272               | 30346                  | 23                         | 720748              | 5624                   | 6                          |
| kmt2d-g4-1      | 123010.5             | 31250                  | 26                         | 716594              | 5504                   | 5                          |
| kmt2d-g4-5      | 124993.5             | 26831                  | 21                         | 713325              | 5172                   | 2                          |
| kmt2d-g4-Cas9-4 | 119952.5             | 24033                  | 28                         | 707322              | 4837                   | 2                          |
| kmt2d-g4-Cas9-5 | 119101.5             | 22956                  | 20                         | 705218              | 4510                   | 4                          |
| kmt2d-g4-Cas9-6 | 122240               | 26406                  | 31                         | 711825              | 5501                   | 2                          |



|                   |          |       |    |        |      |    |
|-------------------|----------|-------|----|--------|------|----|
| kmt2d-g4-Cas9-7   | 119373   | 33534 | 31 | 717861 | 5671 | 3  |
| kmt2d-g4-Cas9-8   | 137530   | 33943 | 23 | 722359 | 5524 | 5  |
| kmt2d-g4-Cas9-9   | 134129   | 37854 | 32 | 721268 | 5812 | 7  |
| smchd1-g4-1       | 128430.5 | 26487 | 32 | 721553 | 5109 | 6  |
| smchd1-g4-2       | 122734.5 | 32737 | 22 | 714473 | 5452 | 1  |
| smchd1-g4-Cas9-2  | 112519.5 | 21120 | 18 | 712893 | 4548 | 1  |
| smchd1-g4-Cas9-3  | 133350.5 | 28182 | 31 | 715977 | 4646 | 6  |
| smchd1-g4-Cas9-4  | 129172.5 | 26522 | 17 | 709164 | 4852 | 7  |
| smchd1-g4-Cas9-5  | 120364   | 26252 | 24 | 716579 | 4391 | 5  |
| smchd1-g4-Cas9-7  | 125670.5 | 24490 | 28 | 718073 | 4766 | 5  |
| smchd1-g4-Cas9-8  | 124193.5 | 26396 | 17 | 713050 | 4667 | 7  |
| smchd1-g5-2       | 139507   | 34868 | 16 | 719051 | 5491 | 4  |
| smchd1-g5-3       | 133208.5 | 32225 | 27 | 721170 | 5669 | 4  |
| smchd1-g5-Cas9-10 | 125004   | 27506 | 13 | 707974 | 4411 | 3  |
| smchd1-g5-Cas9-2  | 128403   | 29684 | 33 | 716875 | 4833 | 5  |
| smchd1-g5-Cas9-4  | 127675.5 | 27174 | 24 | 717089 | 5516 | 4  |
| smchd1-g5-Cas9-6  | 126063   | 31473 | 42 | 721368 | 5204 | 11 |
| smchd1-g5-Cas9-8  | 95182.5  | 15438 | 14 | 668596 | 3244 | 2  |
| smchd1-g5-Cas9-9  | 107702   | 24169 | 33 | 721002 | 6121 | 2  |

\*Reported count is an average of the counts called against the female parent and the counts called against the male parent.

**Suppl. Table S9: Wilcox comparison p-values on predicted variants in F0**

| <b>Sample</b>                      | <b>MuTect2</b>                  |                                 |                  | <b>VarScan2</b>                 |                                 |                  |
|------------------------------------|---------------------------------|---------------------------------|------------------|---------------------------------|---------------------------------|------------------|
|                                    | <b>AF <math>\geq</math> 0.3</b> | <b>AF <math>\geq</math> 0.1</b> | <b>All calls</b> | <b>AF <math>\geq</math> 0.3</b> | <b>AF <math>\geq</math> 0.1</b> | <b>All calls</b> |
| <b>Control vs edited</b>           | <b>0.04</b>                     | <b>0.08</b>                     | <b>0.89</b>      | <b>0.15</b>                     | <b>0.48</b>                     | <b>0.82</b>      |
| <b>Cas9 present vs<br/>absent</b>  | <b>0.04</b>                     | <b>0.15</b>                     | <b>0.74</b>      | <b>0.05</b>                     | <b>0.34</b>                     | <b>0.89</b>      |
| <b>Guide present vs<br/>absent</b> |                                 |                                 |                  |                                 |                                 |                  |
| <b>High vs none</b>                | <b>0.90</b>                     | <b>0.31</b>                     | <b>0.58</b>      | <b>0.16</b>                     | <b>0.26</b>                     | <b>0.41</b>      |
| <b>Low vs none</b>                 | <b>0.69</b>                     | <b>0.86</b>                     | <b>0.87</b>      | <b>0.69</b>                     | <b>0.49</b>                     | <b>0.58</b>      |

**Suppl. Table S10: Wilcox comparison p-values on reviewed variants in F0 (VarScan2 only)**

| <b>Sample</b>                  | <b>AF <math>\geq</math> 0.3</b> |
|--------------------------------|---------------------------------|
| <b>Control vs edited</b>       | <b>0.38</b>                     |
| <b>Cas9 present vs absent</b>  | <b>0.32</b>                     |
| <b>Guide present vs absent</b> |                                 |
| <b>High vs none</b>            | <b>0.50</b>                     |
| <b>Low vs none</b>             | <b>0.61</b>                     |

**Suppl. Table S11: Wilcox comparison p-values on variants called by both callers in F0**

| <b>Sample</b>                  | <b>AF <math>\geq</math> 0.3</b> | <b>AF <math>\geq</math> 0.1</b> | <b>No filter</b> |
|--------------------------------|---------------------------------|---------------------------------|------------------|
| <b>Control vs edited</b>       | <b>0.78</b>                     | <b>0.49</b>                     | <b>0.97</b>      |
| <b>Cas9 present vs absent</b>  | <b>0.96</b>                     | <b>0.77</b>                     | <b>0.51</b>      |
| <b>Guide present vs absent</b> |                                 |                                 |                  |
| <b>High vs none</b>            | <b>1.0</b>                      | <b>1.0</b>                      | <b>0.25</b>      |
| <b>Low vs none</b>             | <b>0.89</b>                     | <b>0.86</b>                     | <b>0.44</b>      |

**Suppl. Table S12: Expected off-target observations in region by chance, hypergeometric p-value**

| <b>Guide</b>     | <b>Sample size<br/>(# off-target sites x<br/>200bp)</b> | <b>Max.<br/>observed<br/>variants in<br/>individual</b> | <b>p-value (under-<br/>represented) vs<br/>population max.<br/>variant rate</b> | <b>p-value (under-<br/>represented) vs<br/>population min.<br/>variant rate</b> |
|------------------|---------------------------------------------------------|---------------------------------------------------------|---------------------------------------------------------------------------------|---------------------------------------------------------------------------------|
| <b>anln-g1</b>   | 317200                                                  | 2                                                       | 1.07e-17                                                                        | .531                                                                            |
| <b>anln-g6</b>   | 524400                                                  | 1                                                       | 5.63e-32                                                                        | .077                                                                            |
| <b>kmt2d-g3</b>  | 269200                                                  | 1                                                       | 4.2e-16                                                                         | .363                                                                            |
| <b>kmt2d-g4</b>  | 169200                                                  | 1                                                       | 5.5e-10                                                                         | .606                                                                            |
| <b>smchd1-g4</b> | 183400                                                  | 0                                                       | NA                                                                              | NA                                                                              |
| <b>smchd1-g5</b> | 151400                                                  | 1                                                       | .367                                                                            | .657                                                                            |

Hypergeometric p-values calculated with the Rothstein lab hypergeometric calculator, using the capture space (74691693 bp) as the population size, and a high or low estimate for the expected population variant counts (10975 vs 608, respectively).

**Suppl. Table S13: Variants at predicted off-target loci**

| Sample           | Condition  | Variant         | Ref             | Alt  | Variant Caller | Predicted off-target | Prediction algorithm         | Allele Frequency |
|------------------|------------|-----------------|-----------------|------|----------------|----------------------|------------------------------|------------------|
| anln-g1-3        | Guide only | 24:28102298*    | A               | C    | VarScan2       | 24:28102339-61       | Cas-OFFinder                 | 0.05             |
| anln-g1-Cas9-7   | Edited     | 24:28102298*    | A               | C    | VarScan2       | 24:28102339-61       | Cas-OFFinder                 | 0.05             |
| anln-g1-3        | Guide only | 2:44898792**    | C               | T    | VarScan2       | 2:44898891-913       | MIT CRISPOR                  | 0.06             |
| anln-g1-Cas9-9   | Edited     | 2:44898798**    | G               | T    | VarScan2       | 2:44898891-913       | MIT CRISPOR                  | 0.06             |
| anln-g1-Cas9-6   | Edited     | 7:65593684**    | AC              | A    | VarScan2       | 7:65593592-602       | CRISPR-direct                | 0.1              |
| anln-g6-Cas9-10  | Edited     | 16:54853302-9** | Clustered event |      | MuTect2        | 16:54853401-11       | CRISPR-direct                | <0.05            |
| kmt2d-g4-Cas9-7  | Edited     | 5:62586647**    | A               | ACAC | VarScan2       | 5:62586546-56        | CRISPR-direct                | 0.26             |
| anln-g6-Cas9-3   | Edited     | 16:10603230†    | C               | A    | VarScan2       | 16:10603172-82       | CRISPR-direct                | 0.06             |
| kmt2d-g3-Cas9-1  | Edited     | 22:20459578†    | C               | T    | VarScan2       | 22:20459646-56       | CRISPR-direct                | 0.08             |
| kmt2d-g3-Cas9-2  | Edited     | 22:20459578†    | C               | T    | VarScan2       | 22:20459646-56       | CRISPR-direct                | 0.08             |
| kmt2d-g3-Cas9-4  | Edited     | 22:20459578†    | C               | T    | VarScan2       | 22:20459646-56       | CRISPR-direct                | 0.1              |
| smchd1-g5-3      | Guide only | 2:50824997-9    | CTG             | AAA  | MuTect2        | 2:50824943-53        | CRISPR-direct                | 0.05             |
| kmt2d-g4-Cas9-5  | Edited     | 14:2529163      | A               | G    | VarScan2       | 14:2529206-28        | Cas-OFFinder                 | 0.05             |
| smchd1-g5-Cas9-2 | Edited     | 25:21049069-77  | ACTAGCGTG       | A    | MuTect2        | 25:21048965-75       | CRISPR-direct                | <0.05            |
| anln-g1-Cas9-6   | Edited     | 14:11156689     | GAGACC          | A    | MuTect2        | 14:11156666-99       | MIT CRISPOR,<br>Cas-OFFinder | <0.05            |

Grey band indicates a potential off-target editing event at a predicted off-target site.

\*Variant at off-target site reported in both control and edited samples for this guide

\*\*Variant observed in siblings from other conditions

† Variant at off-target site not supported by reads on both strands
